# Supplementary material for: Microfluidic fabrication of monodisperse microcapsules with gas cores
Source: Royal Society of Chemistry journal article supplement (doi:10.1039/d4lc00443d), 2024-01-01
Supplement: d4lc00443d1.pdf [file d4lc00443d1.pdf]

Supplementary Material (ESI) for Lab on a Chip  
This journal is © The Royal Society of Chemistry 2024

## **Microfluidic fabrication of monodisperse microcapsules with gas core**

Shi-Hao Yang,<sup>a</sup> Wan-Lu Song,<sup>a</sup> Lin-Ling Fan,<sup>a</sup> Chuan-Fu Deng,<sup>a</sup> Rui Xie,<sup>a,b</sup> Wei Wang,<sup>a,b</sup> Zhuang Liu,<sup>a,b</sup> Da-Wei Pan,<sup>a,b</sup> Xiao-Jie Ju<sup>a,b,\*</sup> and Liang-Yin Chu<sup>a,\*</sup>

<sup>a</sup> *School of Chemical Engineering, Sichuan University, Chengdu, Sichuan 610065, China.*

*E-mail: juxiaojie@scu.edu.cn, chuly@scu.edu.cn.*

<sup>b</sup> *State Key Laboratory of Polymer Materials Engineering, Sichuan University, Chengdu, Sichuan 610065, China.*

Supplementary Figure S1

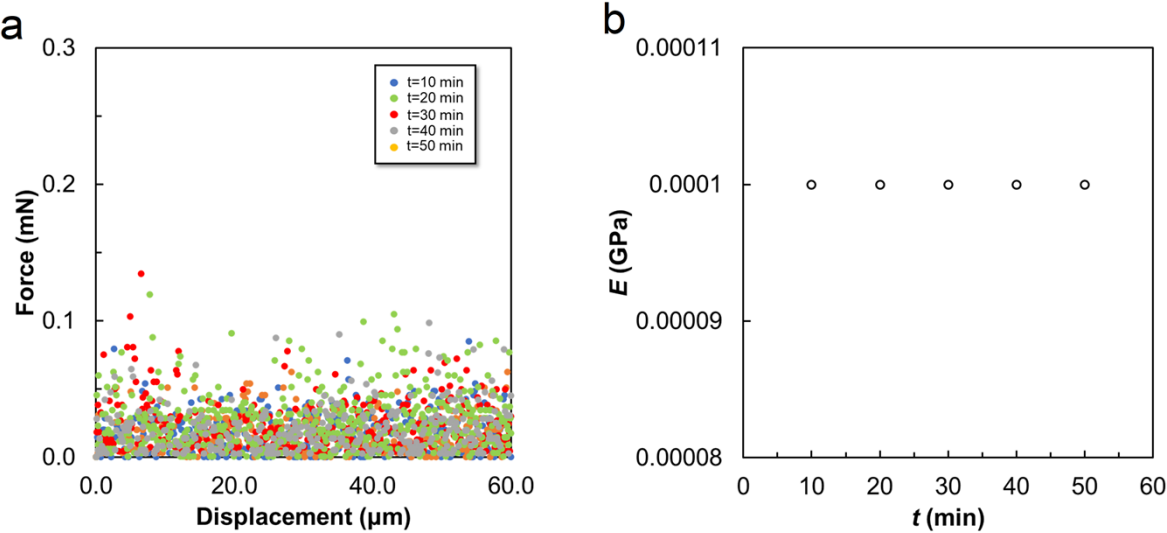

**Fig. S1.** The elastic property of gas-core microcapsules. (a) The force-displacement curves of gas-core microcapsules prepared with different polymerization time periods. (b) Effect of the polymerization time on the Young's moduli of gas-core microcapsules.

## **Supplementary Movies S1 and S2**

**Movie S1.** The fabrication process of gas-core droplet templates in the microfluidic device.

**Movie S2.** The ultrasound-triggered burst release process of a gas-core microcapsule.
